# Supplementary material
Source: MDPI journal article supplement (https://www.mdpi.com/2073-431X/10/6/78)
Supplement: s1 [file s1]

Archive with 1 entries (1 files):
- computers-1217658-supplementary.pdf
