# Supplementary material
Source: MDPI journal article supplement (https://www.mdpi.com/2073-431X/10/6/78)
Supplement: s1 [file s1 › computers-1217658-supplementary.pdf]

# Spatial Low-Rank Tensor Factorization and Unmixing of Hyperspectral Images

William Navas-Auger<sup>1</sup>, Vidya Manian<sup>2</sup>

## 1. Synthetic images

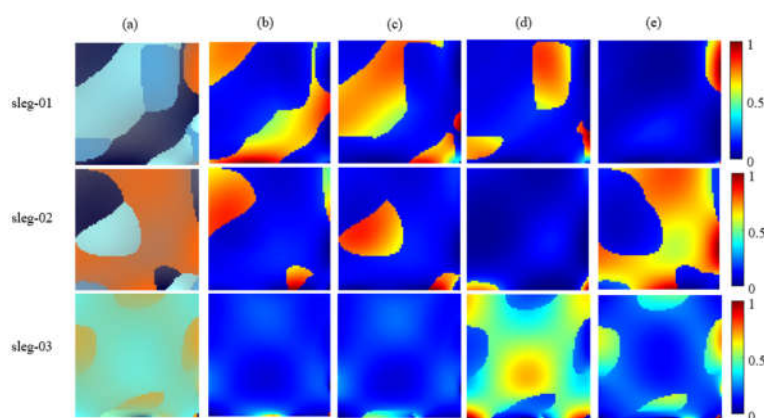

**Figure S1.** Synthetic HSI with Legendre Polynomial Abundances. Column (a) shows a false color HSI rendering. Columns (b) to (e) show reference abundances for Axinite, Brucite, Carnalite, and Chlorite.

**Citation:** Navas-Auger, W.; Manian, V. Spatial Low-Rank Tensor Factorization and Unmixing of Hyperspectral Images. *Computers* **2021**, *10*, 78. <https://doi.org/10.3390/computers10060078>

Academic Editor: Lucia Maddalena

Received: 26 April 2021

Accepted: 24 May 2021

Published: 11 June 2021

**Publisher's Note:** MDPI stays neutral with regard to jurisdictional claims in published maps and institutional affiliations.

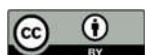

**Copyright:** © 2021 by the authors. Licensee MDPI, Basel, Switzerland. This article is an open access article distributed under the terms and conditions of the Creative Commons Attribution (CC BY) license (<http://creativecommons.org/licenses/by/4.0/>).

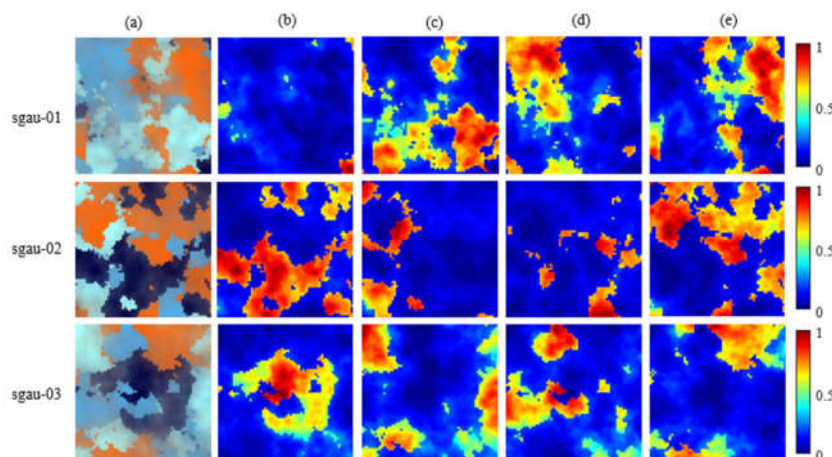

**Figure S2:** HSI with Gaussian Field Abundances. Column (a) shows a false color HSI rendering. Columns (b) to (e) show reference abundances for Axinite, Brucite, Carnalite, and Chlorite.

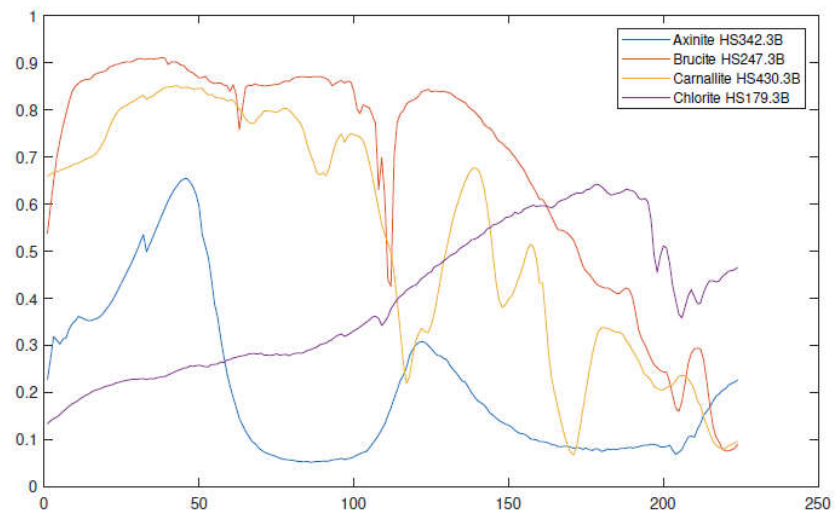

Figure S3: Spectral signatures of synthetic image endmembers

### Real Hyperspectral Image results

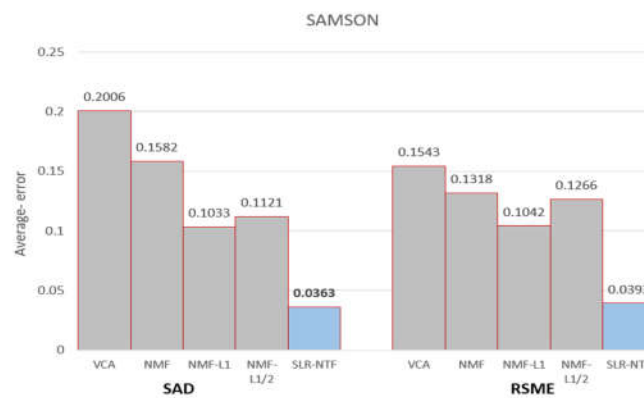

Figure S4: Samson Ridge SAD and RMSE against benchmark

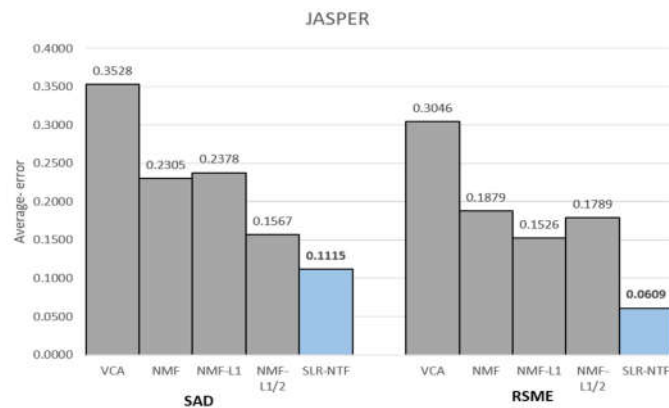

Figure S5. Jasper Ridge SAD and RMSE against benchmark

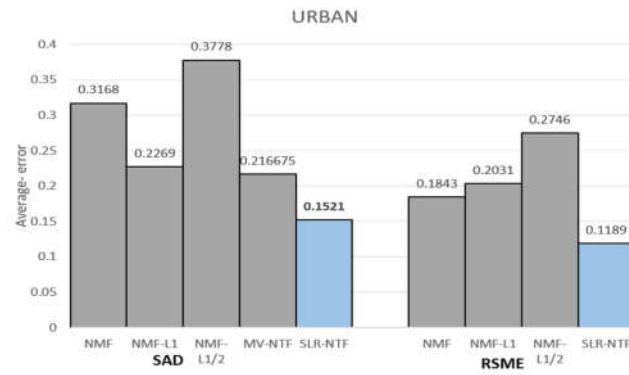

**Figure S6.** Urban SAD and RMSE against benchmark
